# Supplementary material for: Magnetic liposomes based on nickel ferrite nanoparticles for biomedical applications
Source: Royal Society of Chemistry journal article supplement (doi:10.1039/c5cp01894c), 2015-01-01
Supplement: c5cp01894c1.pdf [file c5cp01894c1.pdf]

## Supplementary Information

### Magnetic Liposomes based on Nickel Ferrite Nanoparticles for Biomedical Applications

Ana Rita O. Rodrigues,<sup>a</sup> I. T. Gomes,<sup>a,b</sup> Bernardo G. Almeida,<sup>a</sup> J. P. Araújo,<sup>b</sup> Elisabete M. S. Castanheira,<sup>a</sup> Paulo J. G. Coutinho<sup>a</sup>

<sup>a</sup> Centro de Física (CFUM), Universidade do Minho, Campus de Gualtar, 4710-057 Braga, Portugal

<sup>b</sup> IFIMUP/IN - Instituto de Nanociência e Nanotecnologia, R. Campo Alegre, 4169-007 Porto, Portugal

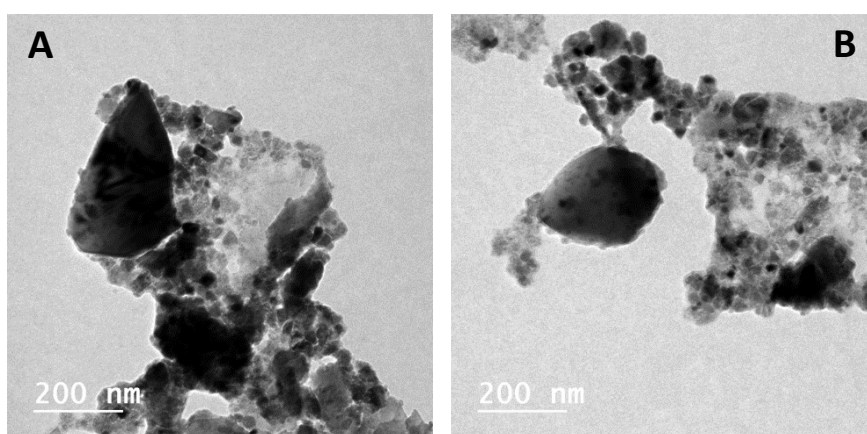

**Fig. S1** TEM images of the synthesized  $\text{NiFe}_2\text{O}_4$  NPs, containing NiO-rich particles (the larger ones).

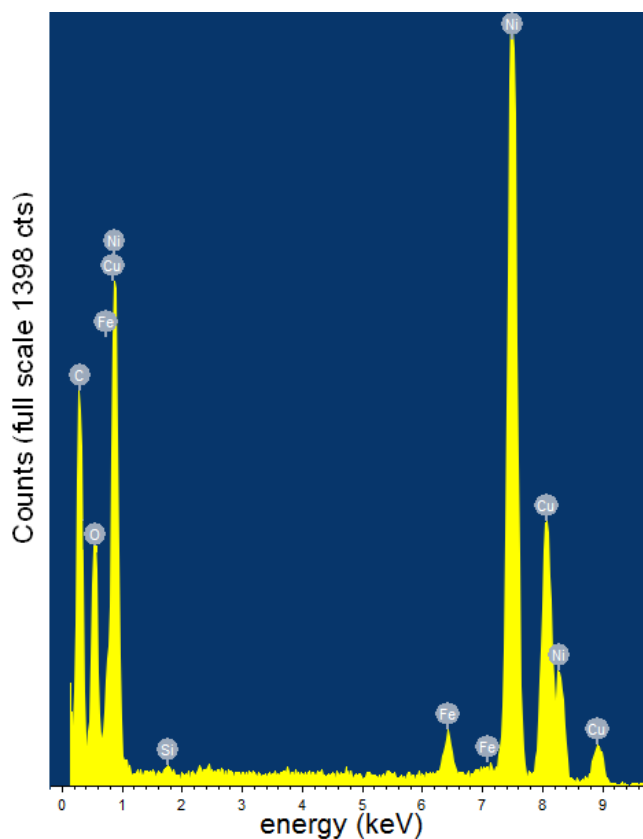

**Fig. S2** EDAX elemental analysis of area corresponding to figure S1A.

**Table S1.** EDAX atomic percentages considering only Ni, Fe and O contributions and comparison with the values predicted for NiO NPs.

| Element | EDAX Atomic (%) | Calculated atomic (%) |
|---------|-----------------|-----------------------|
| Ni      | 54.2            | 50.0                  |
| Fe      | 2.5             | 0                     |
| O       | 43.3            | 50.0                  |

## Details of Rietveld XRD analysis using FullProf Software

Bragg-Brentano (X-rays) geometry

March-Dollase model for preferred orientation with

$G_1=0$  and  $G_2=1$  which corresponds to **no preferred orientation** ( $P_h=1$ )

Background defined by a 6 coefficient polynomial centered at  $2\Theta=40^\circ$

Profile function used was T-C-H Pseudo-Voigt function convoluted with asymmetry due to axial divergence, as formulated by van Laar and Yelon.<sup>S1</sup>

Instrumental Resolution Function obtained with a XRD pattern of a reference sample

|          |         |         |         |         |         |
|----------|---------|---------|---------|---------|---------|
| U-inst   | V-inst  | W-inst  | X-inst  | Y-inst  | Z-inst  |
| -0.02522 | 0.00705 | 0.02608 | 0.00000 | 0.00000 | 0.00000 |

where U, V, W, X, Y and Z define the variation of Gaussian and Lorentzian widths of the peaks profile with diffraction angle.<sup>S2,S3</sup>

Zero point fixed to -0.0608 (obtained from the XRD pattern of a reference sample)

Displacement peak-shift parameter: SyCos =  $0.0122 \pm 0.0006$  (Fit 1)  
 $0.0113 \pm 0.0007$  (Fit 2)  
 $0.0118 \pm 0.0006$  (Fit 3)

$$\Delta(2\theta) = -\text{SyCos} \times \text{Cos}(\theta)$$

Transparency peak-shift parameter: SySin =  $0.020 \pm 0.003$  (Fit 1)  
 $0.012 \pm 0.003$  (Fit 2)  
 $0.023 \pm 0.003$  (Fit 3)

$$\Delta(2\theta) = \text{SySin} \times \text{Sin}(2\theta)$$

### Phase 1: NiFe<sub>2</sub>O<sub>4</sub>

Number of Space group: 227

Hermann-Mauguin Symbol: F d -3 m

Hall Symbol: -F 4vw 2vw 3

Atom coordinates, occupation and isothermal factors (Bs)

| Atom  | x/a            | y/b            | z/b            | Occ       | B            |
|-------|----------------|----------------|----------------|-----------|--------------|
| Fe_T  | 0.125          | 0.125          | 0.125          | 1         | -1.272±0.007 |
|       | 0.125          | 0.125          | 0.125          | 1         | 0            |
|       | 0.125          | 0.125          | 0.125          | 0.76±0.03 | -1.282±0.007 |
| Fe_Oh | 0.5            | 0.5            | 0.5            | 1         | -1.150±0.007 |
|       | 0.5            | 0.5            | 0.5            | 1         | 0            |
|       | 0.5            | 0.5            | 0.5            | 1.24±0.03 | -1.132±0.007 |
| Ni_Oh | 0.5            | 0.5            | 0.5            | 1         | -1.150±0.007 |
|       | 0.5            | 0.5            | 0.5            | 1         | 0            |
|       | 0.5            | 0.5            | 0.5            | 0.76±0.03 | -1.132±0.007 |
| O     | 0.2515±0.00003 | 0.2515±0.00003 | 0.2515±0.00003 | 4         | -1.861±0.015 |
|       | 0.2512±0.00003 | 0.2512±0.00003 | 0.2512±0.00003 | 4         | 0            |
|       | 0.2517±0.00003 | 0.2517±0.00003 | 0.2517±0.00003 | 4         | -1.88±0.015  |
| Ni_T  | 0.125          | 0.125          | 0.125          | 0         | -1.272±0.007 |
|       | 0.125          | 0.125          | 0.125          | 0         | 0            |
|       | 0.125          | 0.125          | 0.125          | 0.24±0.03 | -1.282±0.007 |

#### Profile parameters

Overall scale factor: 0.0000001722 ± 0.0000000001 (Fit 1)  
0.00000019887 ± 0.00000000009 (Fit 2)  
0.00000001723 ± 0.0000000001 (Fit 3)

#### Cell parameters:

a=8.3350 ± 0.0001 (Fit 1)  
8.3339 ± 0.0001 (Fit 2)  
8.3352 ± 0.0001 (Fit 3)

b=8.3350 ± 0.0001 (Fit 1)  
8.3339 ± 0.0001 (Fit 2)  
8.3352 ± 0.0001 (Fit 3)

c=8.3350 ± 0.0001 (Fit 1)  
8.3339 ± 0.0001 (Fit 2)  
8.3352 ± 0.0001 (Fit 3)

Preferred orientation: G<sub>1</sub> = 1  
G<sub>2</sub> = 0

#### X (strain enlargement) and Y (size enlargement) parameters:

X = 0  
Y = 0.4263 ± 0.0003 (Fit 1)  
0.4195 ± 0.0003 (Fit 2)  
0.4258 ± 0.0003 (Fit 3)

**Phase 2: FeNaO<sub>2</sub>**

Number of Space group: 33  
Hermann-Mauguin Symbol: P n a 21  
Hall Symbol: P 2c -2n  
COD ID = 1008191

Atom coordinates, occupation and isothermal factors (Bs)

| Atom | x/a   | y/b   | z/b   | Occ | B            |
|------|-------|-------|-------|-----|--------------|
| Fe   | 0.062 | 0.13  | 0     | 1   | 0.33 ± 0.03  |
|      | 0.062 | 0.13  | 0     | 1   | 0            |
|      | 0.062 | 0.13  | 0     | 1   | 0.37 ± 0.03  |
| Na   | 0.416 | 0.151 | 0.489 | 1   | -2.40 ± 0.03 |
|      | 0.416 | 0.151 | 0.489 | 1   | 0            |
|      | 0.416 | 0.151 | 0.489 | 1   | -2.41 ± 0.03 |
| O1   | 0.043 | 0.084 | 0.339 | 1   | 2.15 ± 0.08  |
|      | 0.043 | 0.084 | 0.339 | 1   | 0            |
|      | 0.043 | 0.084 | 0.339 | 1   | 2.26 ± 0.08  |
| O2   | 0.38  | 0.153 | 0.927 | 1   | -2.60 ± 0.05 |
|      | 0.38  | 0.153 | 0.927 | 1   | 0            |
|      | 0.38  | 0.153 | 0.927 | 1   | -2.52 ± 0.05 |

**Profile parameters**

Overall scale factor: 0.0003173 ± 0.0000005 (Fit 1)  
0.0003247 ± 0.0000004 (Fit 2)  
0.0003172 ± 0.0000005 (Fit 3)

**Cell parameters:**

a= 5.61077 ± 0.00008 (Fit 1)  
5.60964 ± 0.00009 (Fit 2)  
5.61087 ± 0.00008 (Fit 3)

b= 7.1917 ± 0.0001 (Fit 1)  
7.1909 ± 0.0001 (Fit 2)  
7.1919 ± 0.0001 (Fit 3)

c= 5.37289 ± 0.00008 (Fit 1)  
5.37188 ± 0.00009 (Fit 2)  
5.37294 ± 0.00008 (Fit 3)

Preferred orientation: G<sub>1</sub>=1  
G<sub>2</sub>= 0

X (strain enlargement) and Y (size enlargement) parameters:

X = 0  
Y = 0.1500 ± 0.0003 (Fit 1)

0.1483 ± 0.0004 (Fit 2)  
 0.1497 ± 0.0003 (Fit 3)

### Phase 3: NiO

Number of Space group: 225  
 Hermann-Mauguin Symbol: F m -3 m  
 Hall Symbol: -F 4 2 3  
 COD ID : 1010381

Atom coordinates, occupation and isothermal factors (Bs)

| Atom | x/a | y/b | z/b | Occ | B            |
|------|-----|-----|-----|-----|--------------|
| Ni   | 0   | 0   | 0   | 1   | 0.55 ± 0.02  |
|      | 0   | 0   | 0   | 1   | 0            |
|      | 0   | 0   | 0   | 1   | 0.61 ± 0.02  |
| O    | 0.5 | 0.5 | 0.5 | 1   | -1.66 ± 0.05 |
|      | 0.5 | 0.5 | 0.5 | 1   | 0            |
|      | 0.5 | 0.5 | 0.5 | 1   | -1.68 ± 0.05 |

Profile parameters

Overall scale factor: 0.00000044 ± 0.00000001 (Fit 1)  
 0.000000450 ± 0.000000007 (Fit 2)  
 0.00000044 ± 0.00000001 (Fit 3)

Cell parameters:

a= 4.1783 ± 0.0006 (Fit 1)  
 4.1777 ± 0.0007 (Fit 2)  
 4.1784 ± 0.0006 (Fit 3)

b= 4.1783 ± 0.0006 (Fit 1)  
 4.1777 ± 0.0007 (Fit 2)  
 4.1784 ± 0.0006 (Fit 3)

c= 4.1783 ± 0.0006 (Fit 1)  
 4.1777 ± 0.0007 (Fit 2)  
 4.1784 ± 0.0006 (Fit 3)

Preferred orientation:  $G_1 = 1$   
 $G_2 = 0$

X (strain enlargement) and Y (size enlargement) parameters:

X = 0  
 Y = 0.296 ± 0.008 (Fit 1)  
 0.321 ± 0.009 (Fit 2)  
 0.296 ± 0.008 (Fit 3)

## Figures of merit

### Fit 1

==> RELIABILITY FACTORS WITH ALL NON-EXCLUDED POINTS FOR PATTERN: 1

=> Cycle: 27 => MaxCycle:250  
=> N-P+C: 3471  
=> R-factors (not corrected for background) for Pattern: 1  
=> Rp: 6.17 Rwp: 8.05 Rexp: 6.19 Chi2: 1.69  
L.S. refinement  
=> Conventional Rietveld R-factors for Pattern: 1  
=> Rp: 11.7 Rwp: 13.0 Rexp: 10.00 Chi2: 1.69  
=> Deviance: 0.589E+04 Dev\* : 1.694  
=> DW-Stat.: 1.2601 DW-exp: 1.9117  
=> N-sigma of the GoF: 28.699

==> RELIABILITY FACTORS FOR POINTS WITH BRAGG CONTRIBUTIONS FOR PATTERN: 1

=> N-P+C: 3248  
=> R-factors (not corrected for background) for Pattern: 1  
=> Rp: 6.16 Rwp: 8.05 Rexp: 6.10 Chi2: 1.75  
L.S. refinement  
=> Conventional Rietveld R-factors for Pattern: 1  
=> Rp: 11.3 Rwp: 12.8 Rexp: 9.68 Chi2: 1.75  
=> Deviance: 0.569E+04 Dev\* : 1.750  
=> DW-Stat.: 1.3033 DW-exp: 1.9093  
=> N-sigma of the GoF: 30.026

=> Global user-weighted Chi2 (Bragg contrib.): 1.80

-----  
BRAGG R-Factors and weight fractions for Pattern # 1  
-----

=> Phase: 1 Nickel iron oxide 14174 Trevorite  
=> Bragg R-factor: 1.99 Vol: 579.048( 0.014)  
Fract(%): 67.23( 0.27)  
=> Rf-factor= 1.85 ATZ: 1080076.500  
Brindley: 1.0000

=> Phase: 2 IronIII sodium oxide --beta  
=> Bragg R-factor: 9.20 Vol: 216.802( 0.006)  
Fract(%): 19.03( 0.08)  
=> Rf-factor= 4.77 ATZ: 443.342  
Brindley: 1.0000

=> Phase: 3 Nickel oxide  
=> Bragg R-factor: 4.44 Vol: 72.945( 0.019)  
Fract(%): 13.74( 0.40)  
=> Rf-factor= 2.50 ATZ: 688429.688  
Brindley: 1.0000

## Fit 2

==> RELIABILITY FACTORS WITH ALL NON-EXCLUDED POINTS FOR PATTERN: 1

=> Cycle: 15 => MaxCycle:250  
=> N-P+C: 3480  
=> R-factors (not corrected for background) for Pattern: 1  
=> Rp: 7.51 Rwp: 9.47 Rexp: 6.20 Chi2: 2.33  
L.S. refinement  
=> Conventional Rietveld R-factors for Pattern: 1  
=> Rp: 14.4 Rwp: 15.4 Rexp: 10.05 Chi2: 2.33  
=> Deviance: 0.814E+04 Dev\* : 2.337  
=> DW-Stat.: 0.9106 DW-exp: 1.9065  
=> N-sigma of the GoF: 55.568

==> RELIABILITY FACTORS FOR POINTS WITH BRAGG CONTRIBUTIONS FOR PATTERN: 1

=> N-P+C: 3255  
=> R-factors (not corrected for background) for Pattern: 1  
=> Rp: 7.55 Rwp: 9.52 Rexp: 6.10 Chi2: 2.43  
L.S. refinement  
=> Conventional Rietveld R-factors for Pattern: 1  
=> Rp: 14.0 Rwp: 15.2 Rexp: 9.73 Chi2: 2.43  
=> Deviance: 0.794E+04 Dev\* : 2.436  
=> DW-Stat.: 0.9332 DW-exp: 1.9037  
=> N-sigma of the GoF: 57.806

=> Global user-weighted Chi2 (Bragg contrib.): 2.49

-----  
BRAGG R-Factors and weight fractions for Pattern # 1  
-----

=> Phase: 1 Nickel iron oxide 14174 Trevorite  
=> Bragg R-factor: 6.35 Vol: 578.819( 0.017)  
Fract(%): 69.77( 0.15)  
=> Rf-factor= 3.75 ATZ: 1080076.500  
Brindley: 1.0000

=> Phase: 2 IronIII sodium oxide - -beta  
=> Bragg R-factor: 11.7 Vol: 216.693( 0.006)  
Fract(%): 17.51( 0.04)  
=> Rf-factor= 7.03 ATZ: 443.342  
Brindley: 1.0000

=> Phase: 3 Nickel oxide  
=> Bragg R-factor: 8.43 Vol: 72.912( 0.021)  
Fract(%): 12.72( 0.21)  
=> Rf-factor= 3.62 ATZ: 688429.688  
Brindley: 1.0000

### Fit 3

==> RELIABILITY FACTORS WITH ALL NON-EXCLUDED POINTS FOR PATTERN: 1

=> Cycle: 70 => MaxCycle:250  
=> N-P+C: 3470  
=> R-factors (not corrected for background) for Pattern: 1  
=> Rp: 6.16 Rwp: 8.04 Rexp: 6.19 Chi2: 1.69  
L.S. refinement  
=> Conventional Rietveld R-factors for Pattern: 1  
=> Rp: 11.7 Rwp: 13.0 Rexp: 10.01 Chi2: 1.69  
=> Deviance: 0.588E+04 Dev\* : 1.693  
=> DW-Stat.: 1.2627 DW-exp: 1.9123  
=> N-sigma of the GoF: 28.545

==> RELIABILITY FACTORS FOR POINTS WITH BRAGG CONTRIBUTIONS FOR PATTERN: 1

=> N-P+C: 3247  
=> R-factors (not corrected for background) for Pattern: 1  
=> Rp: 6.15 Rwp: 8.04 Rexp: 6.09 Chi2: 1.74  
L.S. refinement  
=> Conventional Rietveld R-factors for Pattern: 1  
=> Rp: 11.3 Rwp: 12.8 Rexp: 9.68 Chi2: 1.74  
=> Deviance: 0.568E+04 Dev\* : 1.749  
=> DW-Stat.: 1.3060 DW-exp: 1.9099  
=> N-sigma of the GoF: 29.868

=> Global user-weighted Chi2 (Bragg contrib.): 1.80

-----  
BRAGG R-Factors and weight fractions for Pattern # 1  
-----

=> Phase: 1 Nickel iron oxide 14174 Trevorite  
=> Bragg R-factor: 2.03 Vol: 579.089( 0.015)  
Fract(%): 67.18( 0.29)  
=> Rf-factor= 1.85 ATZ: 1080076.500  
Brindley: 1.0000

=> Phase: 2 IronIII sodium oxide - -beta  
=> Bragg R-factor: 9.22 Vol: 216.814( 0.006)  
Fract(%): 19.00( 0.09)  
=> Rf-factor= 4.80 ATZ: 443.342  
Brindley: 1.0000

=> Phase: 3 Nickel oxide  
=> Bragg R-factor: 4.50 Vol: 72.954( 0.020)  
Fract(%): 13.82( 0.43)  
=> Rf-factor= 2.52 ATZ: 688429.688  
Brindley: 1.0000

Microstructural analysis was performed by Fullprof software using the broadening of the XRD peaks with an implementation previously described.<sup>S2,S3</sup>



## References

**S1.** B. van Laar, W. B. Yelon, The peak in neutron powder diffraction, *J. Appl. Cryst.*, 1984, **17**, 47-54.

**S2.** J. Rodríguez-Carvajal, T. Roisnel, Line Broadening analysis Using FullProf: Determination of Microstructural Properties, *Materials Science Forum*, 2004, **443-444**, 123-126.

**S3.** J. Rodríguez-Carvajal, *Study of Micro-Structural Effects by Powder Diffraction Using the Program FULLPROF*, IV Congreso de la Sociedad Mexicana de Cristalografía, Morelia, Michoacan, México, Libro de Resúmenes, 2003, 66-75.

[http://sdpd.univ-lemans.fr/DU-SDPD/pdf/Microstructural\\_effects.pdf](http://sdpd.univ-lemans.fr/DU-SDPD/pdf/Microstructural_effects.pdf)
